# Supplementary material
Source: PubMed Central journal article supplement (PMC9883398)

C

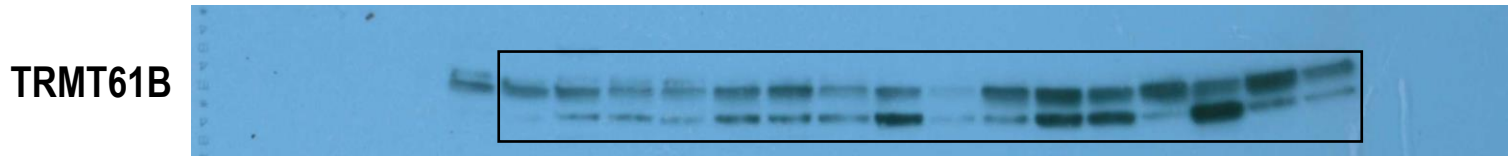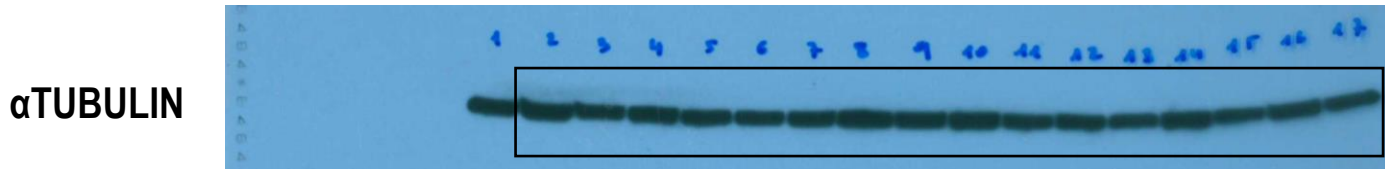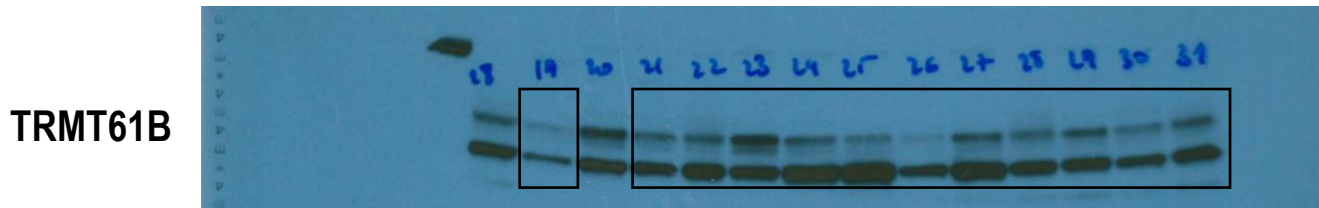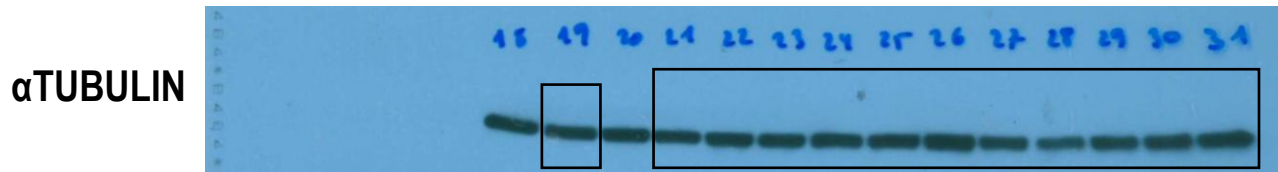

Figure 4

**b**

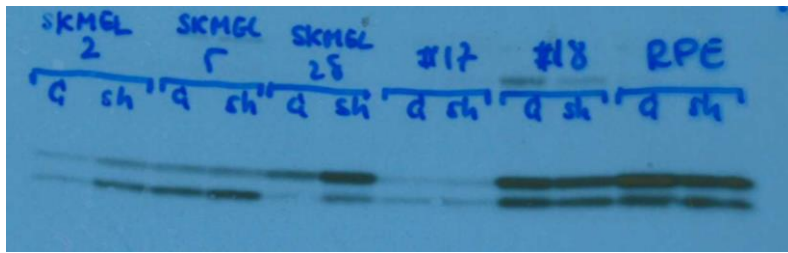

LC3B

$\alpha$ TUBULIN

TRMT61B

**d**

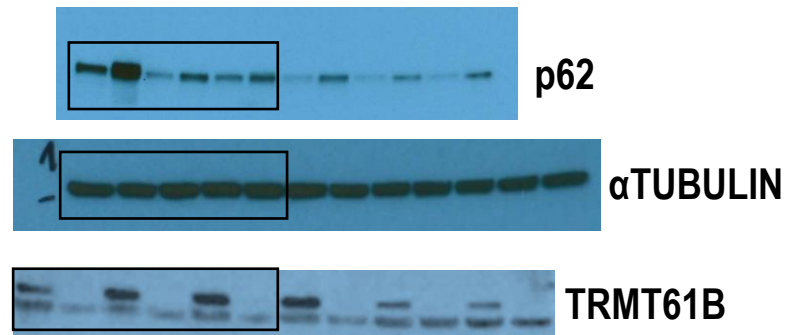

p62

$\alpha$ TUBULIN

TRMT61B

**f**

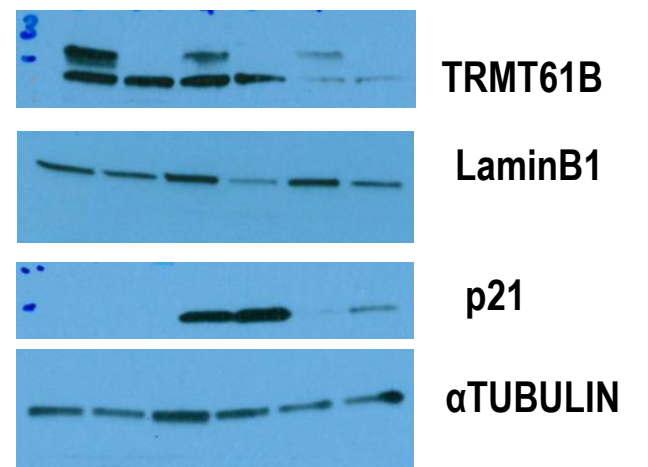

TRMT61B

LaminB1

p21

$\alpha$ TUBULIN

**c**

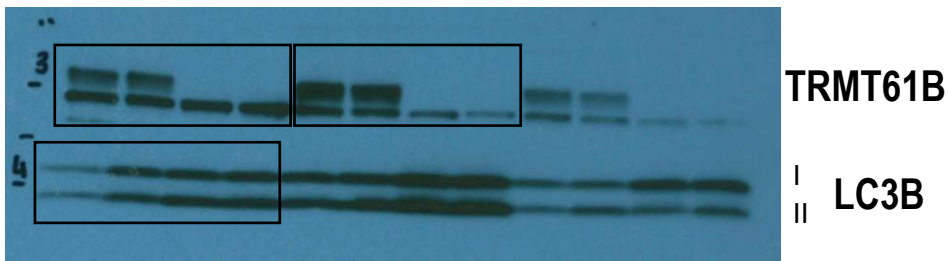

TRMT61B

LC3B

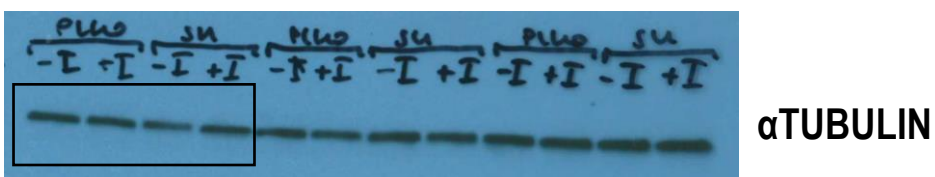

$\alpha$ TUBULIN

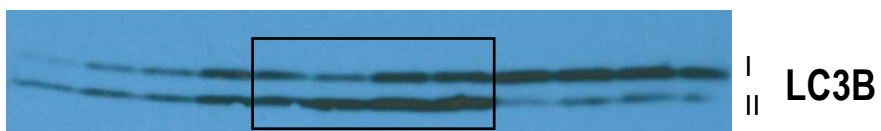

LC3B

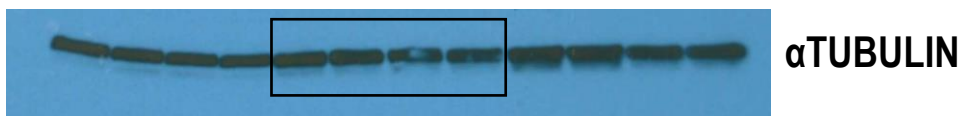

$\alpha$ TUBULIN

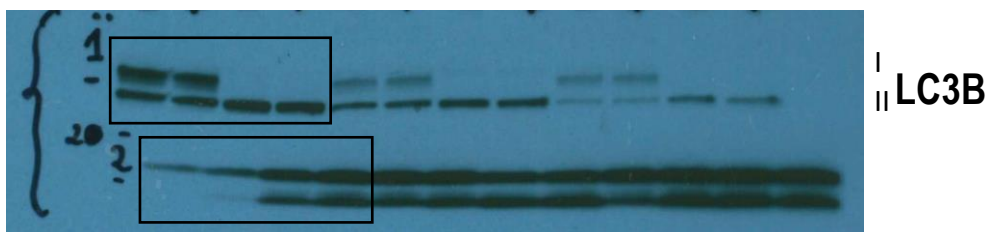

LC3B

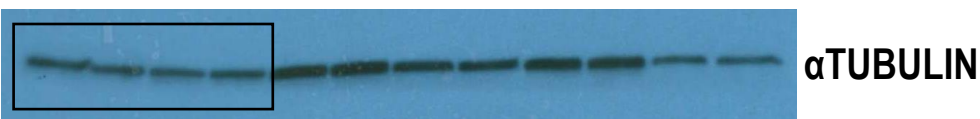

$\alpha$ TUBULIN

d

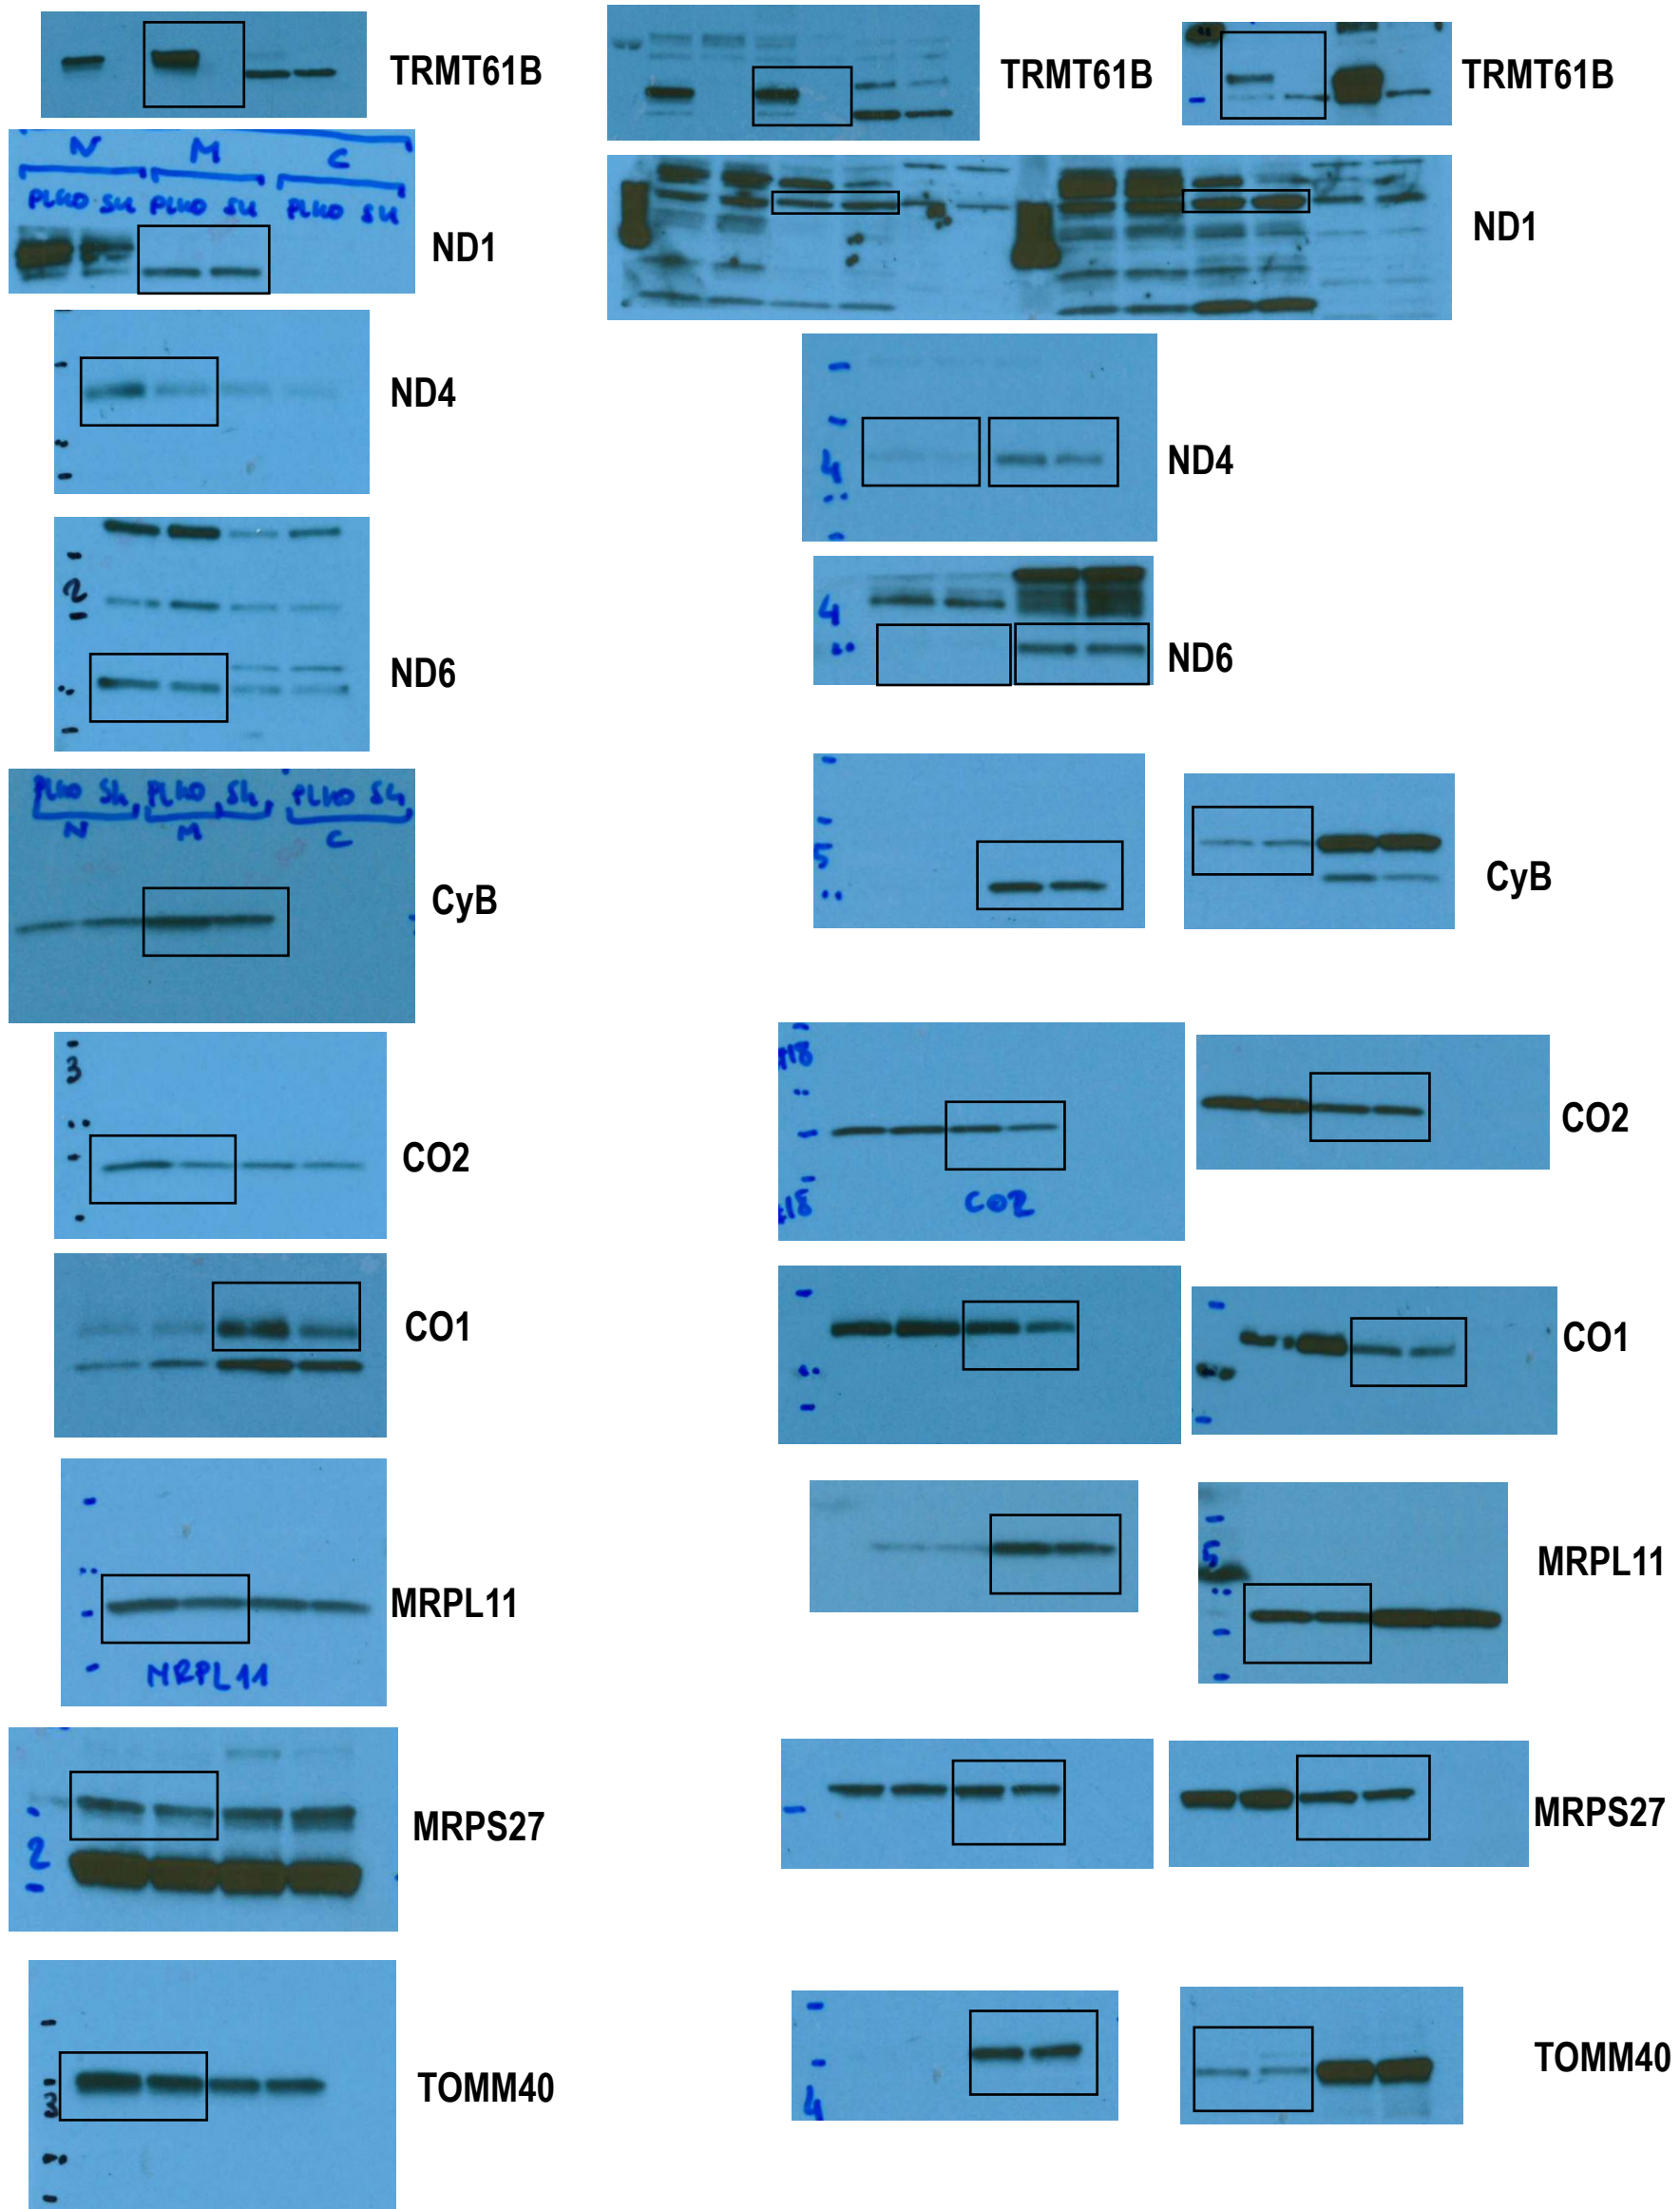

**b**

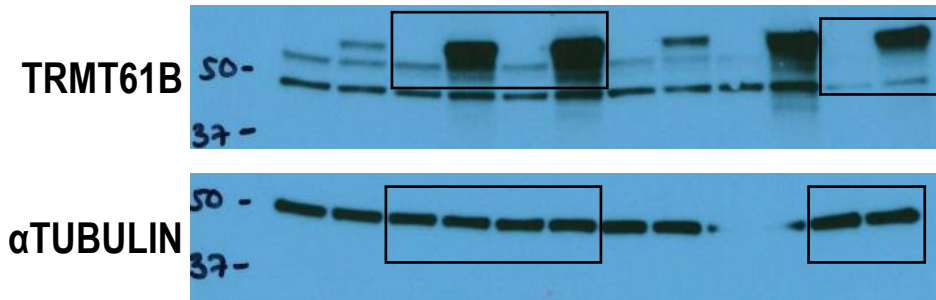

**c**

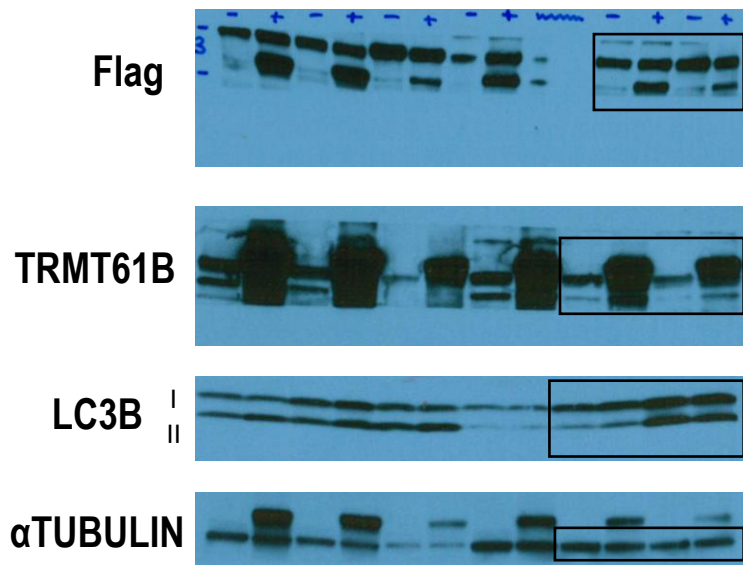

**d**

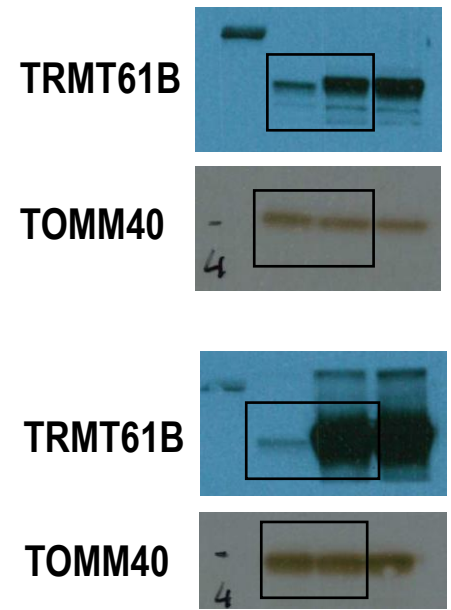

**e**

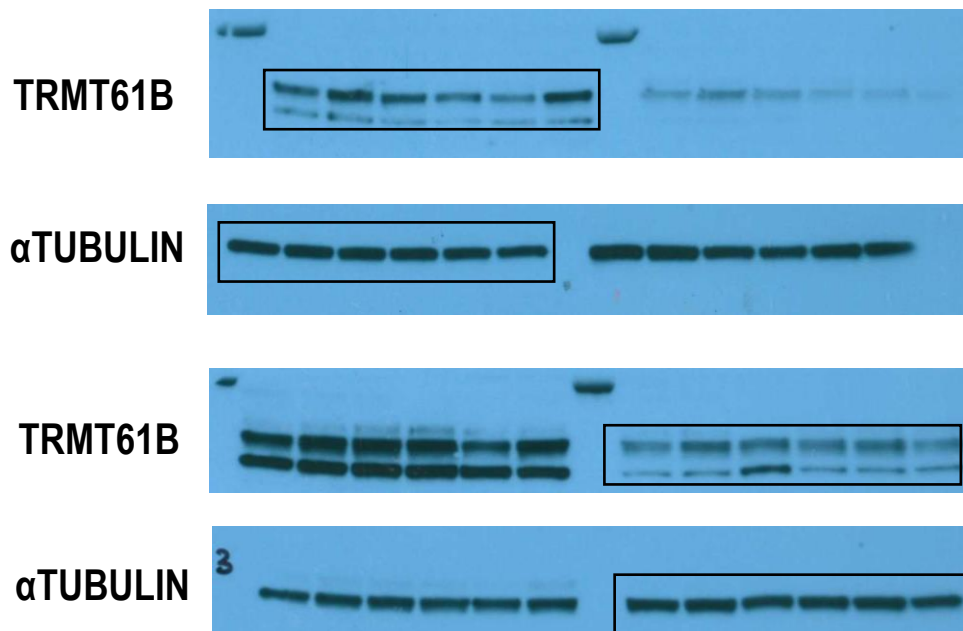



**a**

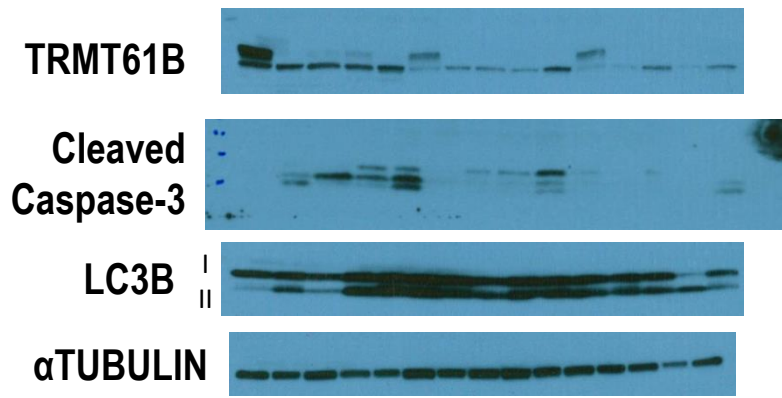

**b**

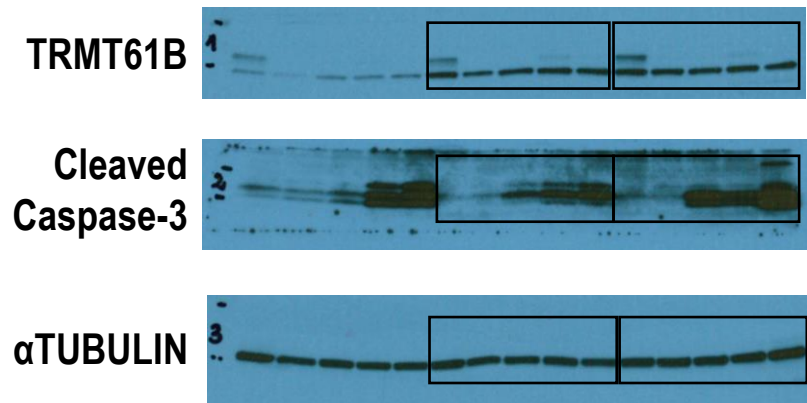

**b**

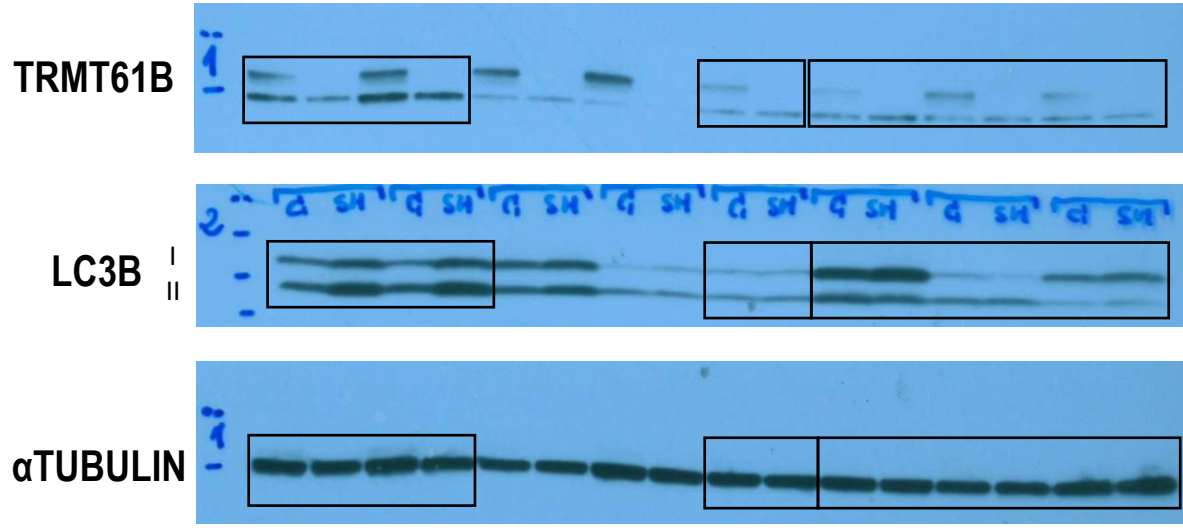

**d**

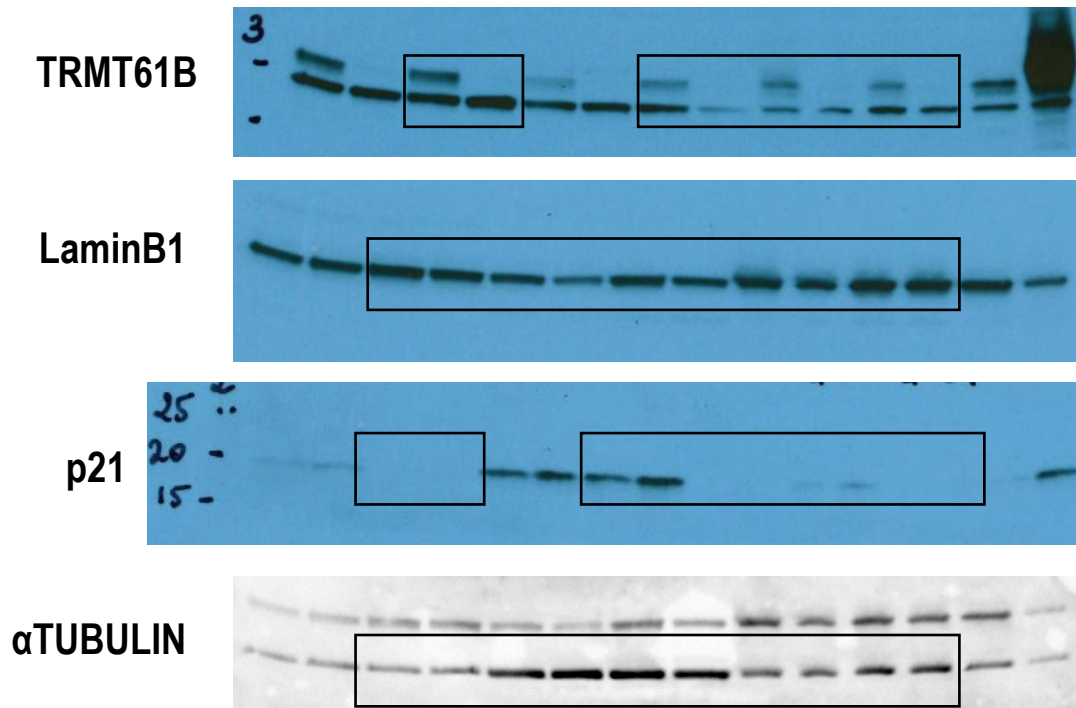

C

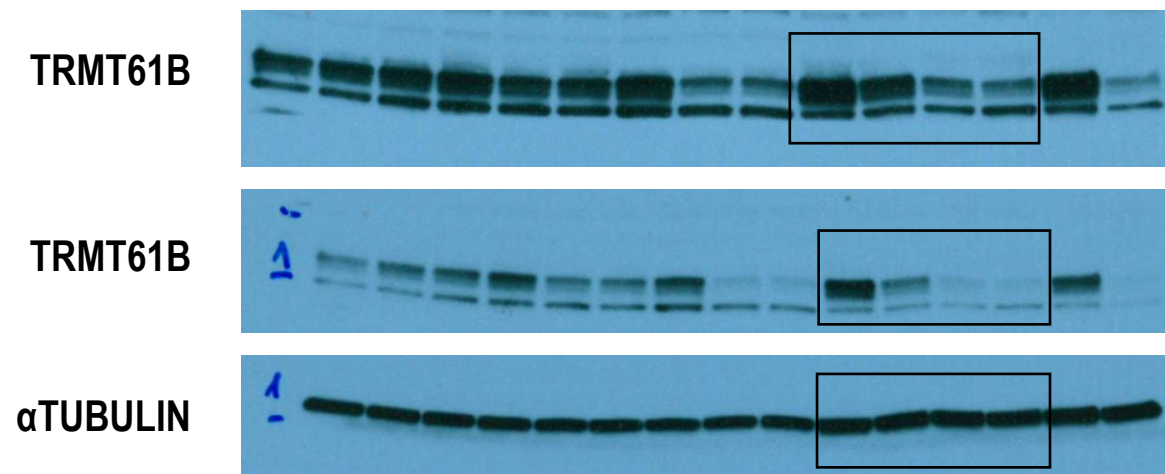

**a**

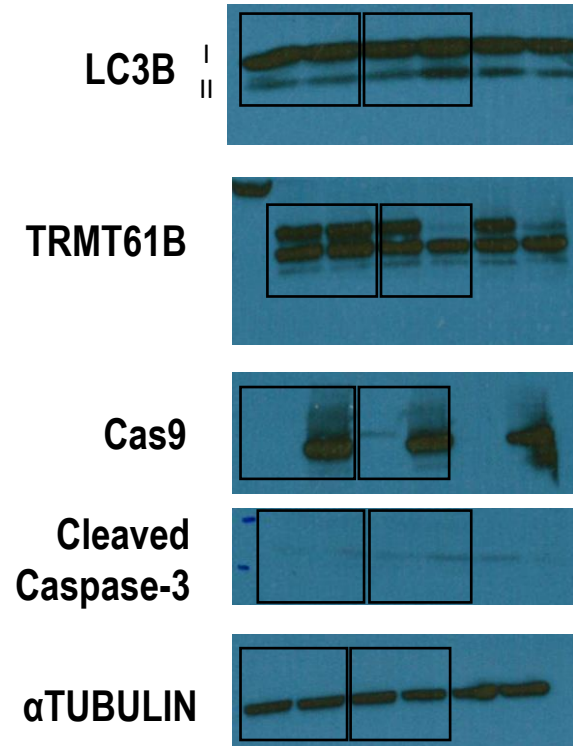



**b**

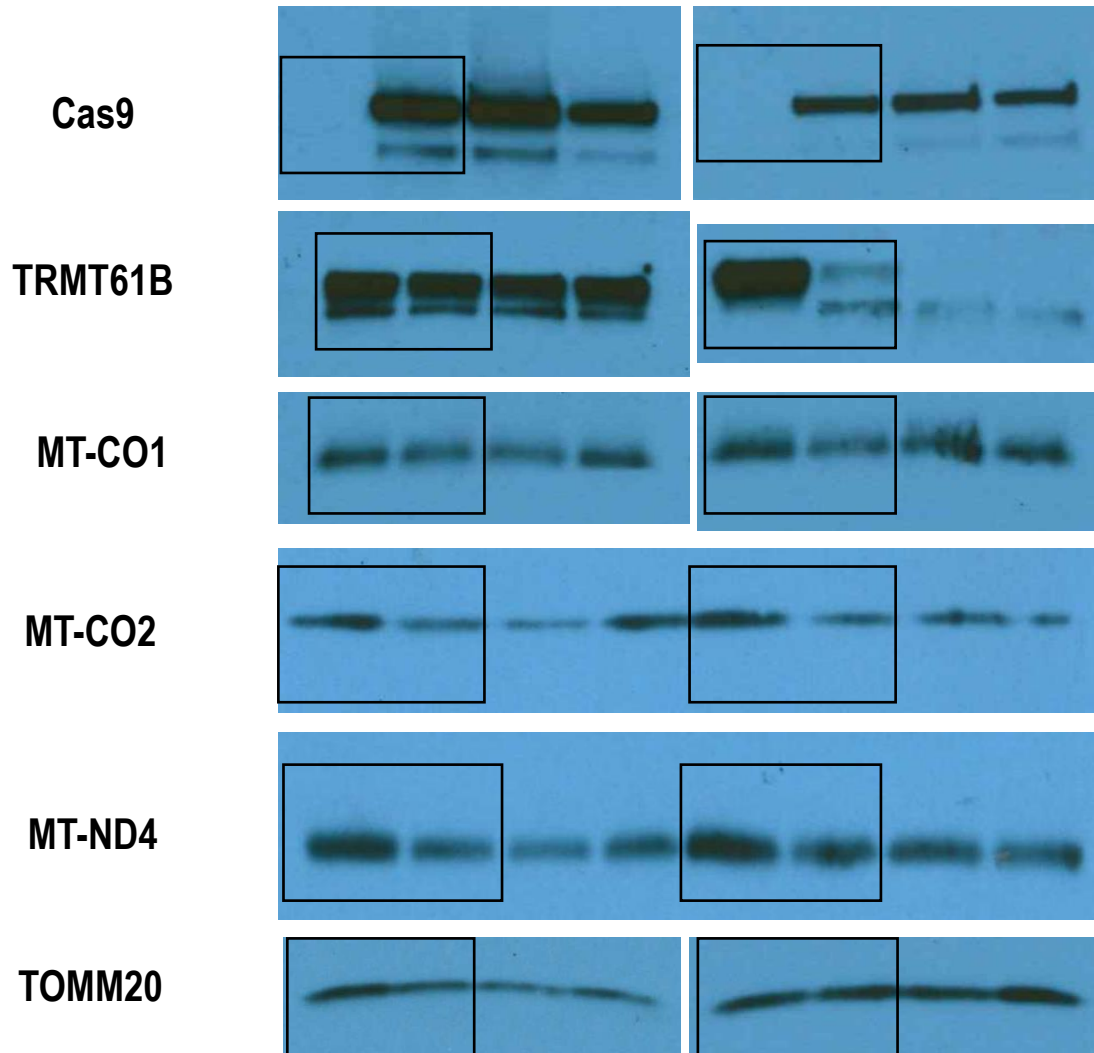

Supplement: 41418_2022_1044_MOESM14_ESM.pdf [file 41418_2022_1044_MOESM14_ESM.pdf]
